# Supplementary material for: Molecular Identification of a Novel Hantavirus in Malaysian Bronze Tube-Nosed Bats (Murina aenea)
Source: PubMed Central journal article supplement (PMC6832519; doi:10.3390/v11100887), 2019-09-21
Supplement: viruses-11-00887-s001.pdf [file viruses-11-00887-s001.pdf]

**Supplementary Materials**

Table S1: List of bat species examined in this study

| Family           | Genus                | Species               | Common name                      |
|------------------|----------------------|-----------------------|----------------------------------|
| Emballonuridae   | <i>Saccolaimus</i>   | <i>saccolaimus</i>    | Bare-rumped Sheath-tail-bat      |
| Hipposideridae   | <i>Hipposideros</i>  | <i>ater</i>           | Dusky Leaf-nosed Bat             |
| Hipposideridae   | <i>Hipposideros</i>  | <i>cervinus</i>       | Fawn-colored Leaf-nosed Bat      |
| Hipposideridae   | <i>Hipposideros</i>  | <i>diadema</i>        | Diadem Leaf-nosed Bat            |
| Hipposideridae   | <i>Hipposideros</i>  | <i>dyacorum</i>       | Dayak Leaf-nosed Bat             |
| Hipposideridae   | <i>Hipposideros</i>  | <i>galeritus</i>      | Cantor's Leaf-nosed Bat          |
| Hipposideridae   | <i>Hipposideros</i>  | <i>larvatus</i>       | Horsfield's Leaf-nosed Bat       |
| Megadermatidae   | <i>Megaderma</i>     | <i>spasma</i>         | Lesser False Vampire             |
| Miniopteridae    | <i>Miniopterus</i>   | <i>australis</i>      | Little Long-fingered Bat         |
| Molossidae       | <i>Chaerephon</i>    | <i>plicatus</i>       | Wrinkle-lipped Free-tailed Bat   |
| Nycteridae       | <i>Nycteris</i>      | <i>tragata</i>        | Malayan Slit-faced Bat           |
| Pteropodidae     | <i>Balionycteris</i> | <i>maculata</i>       | Spotted-winged Fruit Bat         |
| Pteropodidae     | <i>Cynopterus</i>    | <i>brachyotis</i>     | Lesser Dog-faced Fruit Bat       |
| Rhinolophidae    | <i>Rhinolophus</i>   | <i>affinis</i>        | Intermediate Horseshoe Bat       |
| Rhinolophidae    | <i>Rhinolophus</i>   | <i>borneensis</i>     | Bornean Horseshoe Bat            |
| Rhinolophidae    | <i>Rhinolophus</i>   | <i>creaghi</i>        | Creagh's Horseshoe Bat           |
| Rhinolophidae    | <i>Rhinolophus</i>   | <i>philippinensis</i> | Large-eared Horseshoe Bat        |
| Rhinolophidae    | <i>Rhinolophus</i>   | <i>trifoliatus</i>    | Trefoil Horseshoe Bat            |
| Vespertilionidae | <i>Glischropus</i>   | <i>tylopus</i>        | Common Thick-thumbed Bat         |
| Vespertilionidae | <i>Kerivoula</i>     | <i>hardwickii</i>     |                                  |
| Vespertilionidae | <i>Kerivoula</i>     | <i>minuta</i>         | Least Woolly Bat                 |
| Vespertilionidae | <i>Kerivoula</i>     | <i>papillosa</i>      | Papillose Woolly Bat             |
| Vespertilionidae | <i>Kerivoula</i>     | <i>pellucida</i>      | Clear-winged Woolly Bat          |
| Vespertilionidae | <i>Murina</i>        | <i>rozendaali</i>     | Gilded Tube-nosed Bat            |
| Vespertilionidae | <i>Murina</i>        | <i>aenea</i>          | Bronze Tube-nosed Bat            |
| Vespertilionidae | <i>Myotis</i>        | <i>horsfieldi</i>     | Horsfield's Myotis               |
| Vespertilionidae | <i>Myotis</i>        | <i>muricola</i>       |                                  |
| Vespertilionidae | <i>Myotis</i>        | <i>ridleyi</i>        | Ridley's Myotis                  |
| Vespertilionidae | <i>Phoniscus</i>     | <i>atrox</i>          | Groove-toothed Trumpet-eared Bat |
| Vespertilionidae | <i>Tylonycteris</i>  | <i>pachypus</i>       | Lesser Bamboo Bat                |

Figure S1: Pairwise alignment of S, M and L segments of viruses in *Hantaviridae* family compared to Sarawak mobatvirus. Our sequence is indicated with S\_segment, M\_segment and L\_segment titles.

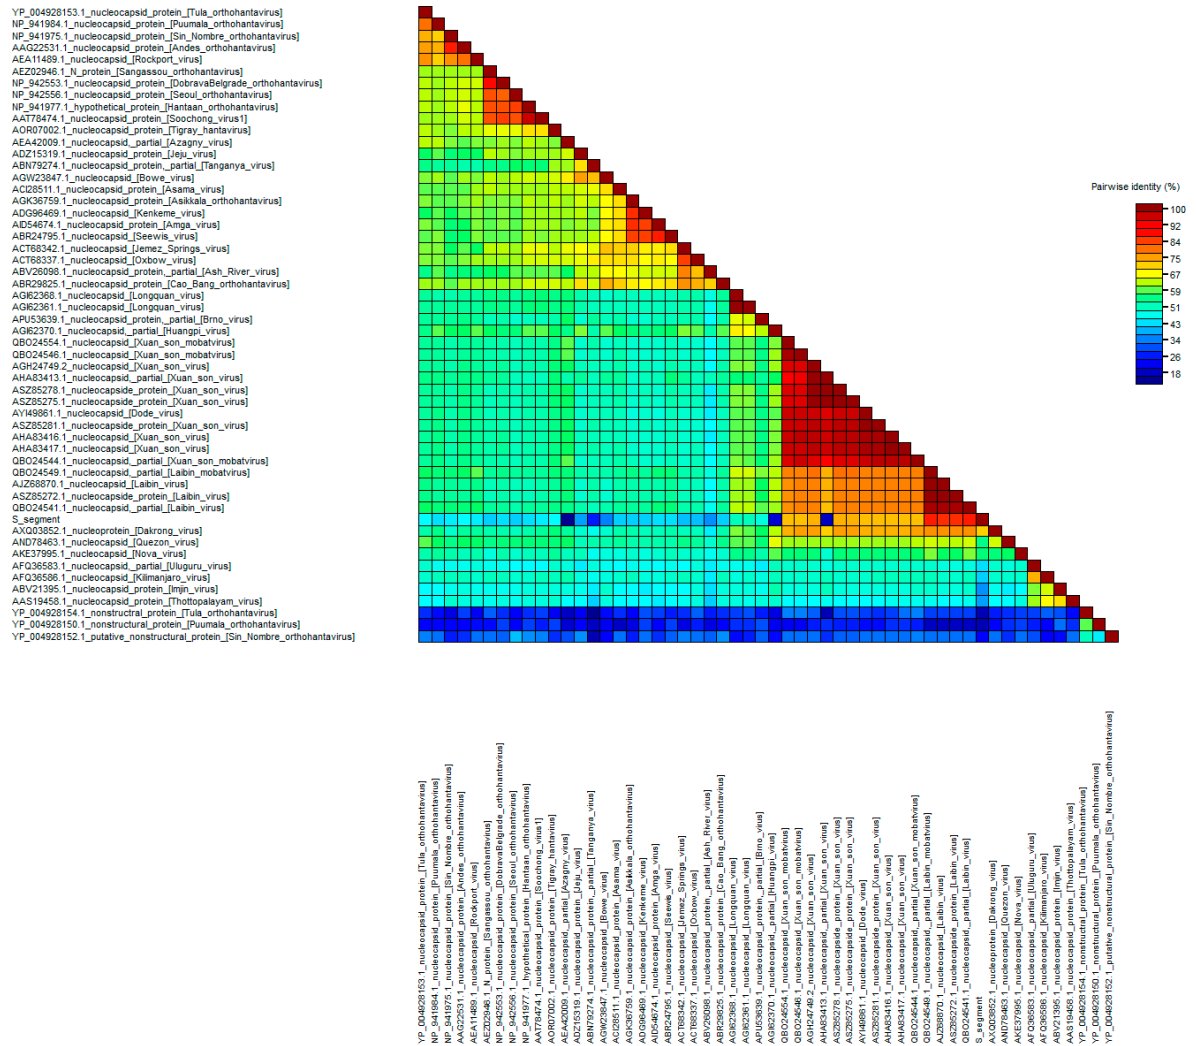

AFQ36587.1\_glycoprotein\_partial\_[Kilimanjaro\_virus]  
 YP\_00191125.1\_envelope\_glycoprotein\_precursor\_[Tshotopalayam\_virus]  
 ABV21398.1\_glycoprotein\_[Imjin\_virus]  
 AFQ36584.1\_glycoprotein\_partial\_[Olguru\_virus]  
 OBO24550.1\_glycoprotein\_[Labin\_mobatvirus]  
 OBO24542.1\_glycoprotein\_[Labin\_virus]  
 ASZ85273.1\_glycoprotein\_[Labin\_virus]  
 AJZ26871.1\_glycoprotein\_[Labin\_virus]  
 M\_segment  
 AXQ03853.1\_glycoprotein\_[Dakrong\_virus]  
 AHX37571.1\_glycoprotein\_partial\_[Xuan\_son\_virus]  
 OBO24555.1\_glycoprotein\_partial\_[Xuan\_son\_mobatvirus]  
 OBO24547.1\_glycoprotein\_[Xuan\_son\_mobatvirus]  
 ASZ285282.1\_glycoprotein\_[Xuan\_son\_virus]  
 ANA76341.2\_glycoprotein\_[Xuan\_son\_virus]  
 ASZ85279.1\_glycoprotein\_[Xuan\_son\_virus]  
 ASZ85276.1\_glycoprotein\_[Xuan\_son\_virus]  
 AY49690.1\_glycoprotein\_partial\_[Dode\_virus]  
 QBO24545.1\_glycoprotein\_partial\_[Xuan\_son\_mobatvirus]  
 AKE37998.1\_glycoprotein\_[Nova\_virus]  
 AND78464.1\_glycoprotein\_[Quezon\_virus]  
 NP\_942586.1\_Glycoproteins\_G1\_and\_G2\_precursor\_[Tula\_orthohantavirus]  
 CA33922.1\_G1\_and\_G2\_proteins\_[Prospect\_Hill\_orthohantavirus]  
 NP\_941983.1\_glycoprotein\_glycoprotein\_precursor\_[Puumala\_orthohantavirus]  
 AAG22532.1\_G1\_and\_G2\_surface\_glycoprotein\_precursor\_[Andes\_orthohantavirus]  
 NP\_941974.1\_glycoprotein\_precursor\_[Sin\_Nombre\_orthohantavirus]  
 EEA11485.1\_glycoprotein\_[Rockport\_virus]  
 AOR07001.1\_glycoprotein\_precursor\_[Tgray\_hantavirus]  
 AEZ02947.1\_glycoprotein\_precursor\_[Sangassou\_orthohantavirus]  
 NP\_942554.1\_glycoprotein\_precursor\_G1G2\_[DobravaBelgrade\_orthohantavirus]  
 NP\_942557.1\_glycoprotein\_precursor\_[Seoul\_orthohantavirus]  
 NP\_941978.1\_hypothetical\_protein\_hTNVMgp1\_[hantaan\_orthohantavirus]  
 AAT77478.1\_glycoprotein\_precursor\_[Soochong\_virus]  
 ABR24796.1\_glycoprotein\_precursor\_partial\_[Seewis\_virus]  
 AGW23848.1\_glycoprotein\_[Bowe\_virus]  
 EEA42010.1\_glycoprotein\_partial\_[Azagny\_virus]  
 ADZ15320.2\_envelope\_glycoprotein\_partial\_[Jeju\_virus]  
 AGK36762.1\_glycoprotein\_precursor\_[Asikata\_orthohantavirus]  
 AD54673.1\_envelope\_glycoprotein\_[Ama\_virus]  
 ADG96470.1\_glycoprotein\_partial\_[Kenkema\_virus]  
 AC28508.1\_envelope\_glycoprotein\_[Asama\_virus]  
 ACT68343.1\_glycoprotein\_partial\_[Ienez\_Springs\_virus]  
 ABR29829.1\_glycoprotein\_[Cao\_Bang\_orthohantavirus]  
 ACT68338.1\_glycoprotein\_[Oxbow\_virus]  
 AGR2348.1\_glycoprotein\_[Longquan\_virus]  
 AGR2343.1\_glycoprotein\_[Longquan\_virus]  
 APUS3640.1\_glycoprotein\_precursor\_partial\_[Brno\_virus]

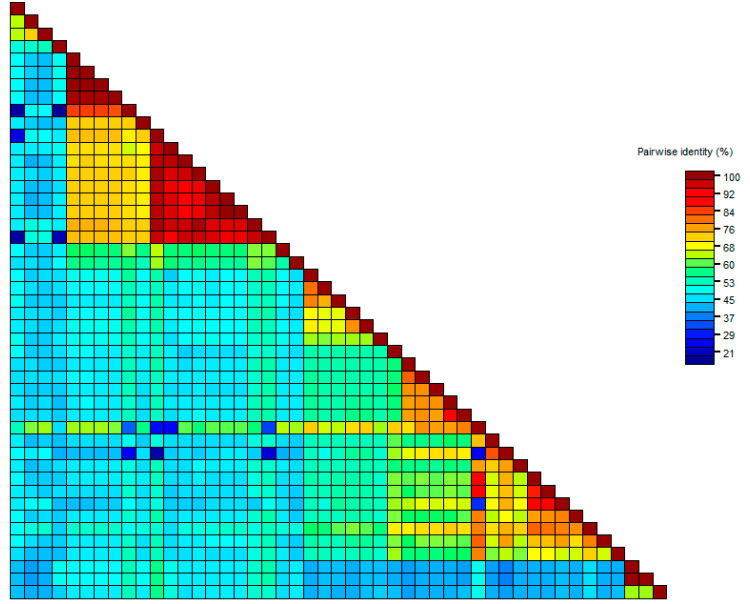

AFQ36587.1\_glycoprotein\_partial\_[Kilimanjaro\_virus]  
 YP\_00191125.1\_envelope\_glycoprotein\_precursor\_[Tshotopalayam\_virus]  
 ABV21398.1\_glycoprotein\_[Imjin\_virus]  
 AFQ36584.1\_glycoprotein\_partial\_[Olguru\_virus]  
 OBO24550.1\_glycoprotein\_[Labin\_mobatvirus]  
 OBO24542.1\_glycoprotein\_[Labin\_virus]  
 ASZ85273.1\_glycoprotein\_[Labin\_virus]  
 AJZ26871.1\_glycoprotein\_[Labin\_virus]  
 M\_segment  
 AXQ03853.1\_glycoprotein\_[Dakrong\_virus]  
 AHX37571.1\_glycoprotein\_partial\_[Xuan\_son\_virus]  
 OBO24555.1\_glycoprotein\_partial\_[Xuan\_son\_mobatvirus]  
 OBO24547.1\_glycoprotein\_[Xuan\_son\_mobatvirus]  
 ASZ285282.1\_glycoprotein\_[Xuan\_son\_virus]  
 ANA76341.2\_glycoprotein\_[Xuan\_son\_virus]  
 ASZ85279.1\_glycoprotein\_[Xuan\_son\_virus]  
 ASZ85276.1\_glycoprotein\_[Xuan\_son\_virus]  
 AY49690.1\_glycoprotein\_partial\_[Dode\_virus]  
 QBO24545.1\_glycoprotein\_partial\_[Xuan\_son\_mobatvirus]  
 AKE37998.1\_glycoprotein\_[Nova\_virus]  
 AND78464.1\_glycoprotein\_[Quezon\_virus]  
 NP\_942586.1\_Glycoproteins\_G1\_and\_G2\_precursor\_[Tula\_orthohantavirus]  
 CA33922.1\_G1\_and\_G2\_proteins\_[Prospect\_Hill\_orthohantavirus]  
 NP\_941983.1\_glycoprotein\_glycoprotein\_precursor\_[Puumala\_orthohantavirus]  
 AAG22532.1\_G1\_and\_G2\_surface\_glycoprotein\_precursor\_[Andes\_orthohantavirus]  
 NP\_941974.1\_glycoprotein\_precursor\_[Sin\_Nombre\_orthohantavirus]  
 EEA11485.1\_glycoprotein\_[Rockport\_virus]  
 AOR07001.1\_glycoprotein\_precursor\_[Tgray\_hantavirus]  
 AEZ02947.1\_glycoprotein\_precursor\_[Sangassou\_orthohantavirus]  
 NP\_942554.1\_glycoprotein\_precursor\_G1G2\_[DobravaBelgrade\_orthohantavirus]  
 NP\_942557.1\_glycoprotein\_precursor\_[Seoul\_orthohantavirus]  
 NP\_941978.1\_hypothetical\_protein\_hTNVMgp1\_[hantaan\_orthohantavirus]  
 AAT77478.1\_glycoprotein\_precursor\_[Soochong\_virus]  
 ABR24796.1\_glycoprotein\_precursor\_partial\_[Seewis\_virus]  
 AGW23848.1\_glycoprotein\_[Bowe\_virus]  
 EEA42010.1\_glycoprotein\_partial\_[Azagny\_virus]  
 ADZ15320.2\_envelope\_glycoprotein\_partial\_[Jeju\_virus]  
 AGK36762.1\_glycoprotein\_precursor\_[Asikata\_orthohantavirus]  
 AD54673.1\_envelope\_glycoprotein\_[Ama\_virus]  
 ADG96470.1\_glycoprotein\_partial\_[Kenkema\_virus]  
 AC28508.1\_envelope\_glycoprotein\_[Asama\_virus]  
 ACT68343.1\_glycoprotein\_partial\_[Ienez\_Springs\_virus]  
 ABR29829.1\_glycoprotein\_[Cao\_Bang\_orthohantavirus]  
 ACT68338.1\_glycoprotein\_[Oxbow\_virus]  
 AGR2348.1\_glycoprotein\_[Longquan\_virus]  
 AGR2343.1\_glycoprotein\_[Longquan\_virus]  
 APUS3640.1\_glycoprotein\_precursor\_partial\_[Brno\_virus]

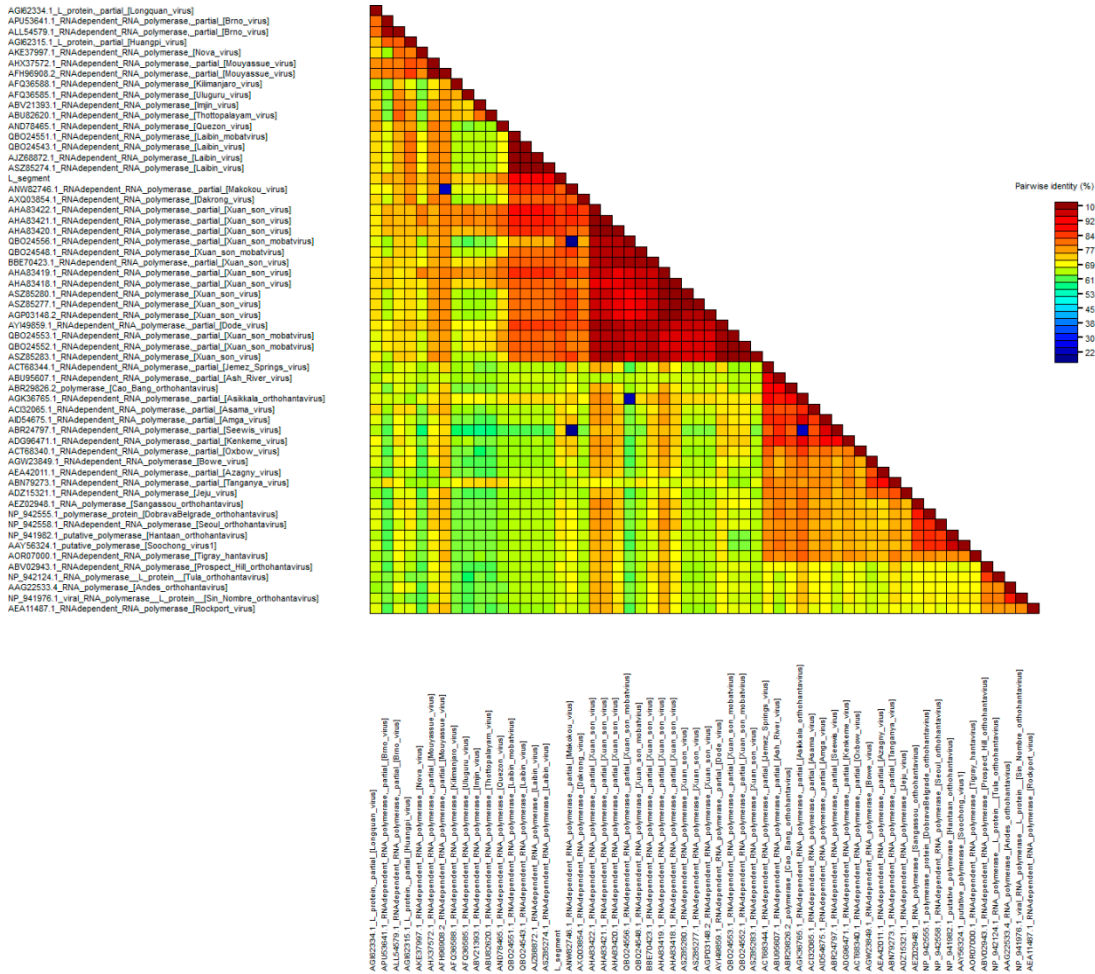

Table S2: Hantavirus accession number list used for pair-wise alignment and phylogenetic analysis

S segment:

KM102247; KY662264; MK064114; MK393932; KC688335; KF704708; KF704711; KF704712;  
 KY662273; MG637438; MK393927; MK393929; MK393937; KY662267; KY662270; MG663534;  
 JX473273; KX845678; JX465415; JX465422; KU950713; EF543524; EF650086; FJ593499; EF636024;  
 KF974360; GQ306148; KC880342; AY526097; EF641804; JF276226; EF050455; KC631782; HQ663933;  
 JX193695; JX193698; EU929072; FJ539166; HM015223; KR072621; NC\_005216; AF291702; Z49098;  
 NC\_005227; NC\_005224; NC\_005233; NC\_005218; AY675349; JQ082300; KU934010; NC\_005236

M segment:

KM102248; KY662265; MK064115; MK393933; KU976427; KJ000539; KY662274; MG637437;  
 MK393928; MK393930; MK393938; KY662268; KY662271; MG663535; KX845679; JX465402;  
 KU950714; EF543526; FJ593500; EF636025; KF974359; GQ306149; KC880345; NC\_010708; EF641798;  
 JF276227; KC631783; HQ663934; JX193696; JX193699; EU929075; FJ539167; KR072622; NC\_005215;  
 AF291703; X55129; NC\_005228; NC\_005223; NC\_005234; NC\_005219; AY675353; JQ082301;  
 KU934009; NC\_005237; HM015219

L segment

KM102249; KY662266; MK064116; MK393934; JX912953; KF704713; KF704714; KF704715; KF704716;  
KF704717; KY662275; MG637436; MK393935; MK393936; LC406451; MK393931; MK393939;  
KY662269; KY662272; MG663536; JN037851; JQ287716; KJ000540; JX465369; KX845680; KR920360;  
JX465388; KT316176; KU950715; EF543525; EF619961; FJ593501; EF636026; KF974361; GQ306150;  
KC880348; EU001330; EF641806; JF276228; EF050454; KC631784; HQ663935; JX193697; JX193700;  
EU929078; FJ593497; HM015221; KR072623; NC\_005217; AF291704; EF646763; NC\_005226;  
NC\_005225; NC\_005235; NC\_005222; DQ056292; JQ082302; KU934008; NC\_005238

Supplementary
